# Supplementary material for: Women’s Narratives about COVID-19, Preventive Practices and Sources of Information in Northwestern Tanzania
Source: MDPI journal article supplement (doi:10.3390/ijerph18105261), 2021-05-15
Supplement: s1 [file s1]

# COVID-19 QUALITATIVE STUDY

## IN-DEPTH INTERVIEW REPORT TEMPLATE

### Objectives

- To set a standardized format for writing the IDI reports after the completion of each phone interview.

### Sections of the report

#### 1) DATA COLLECTION PROCESS

##### 1.1 Time & date of the interview

##### 1.2 Length of the interview

##### 1.3 How the respondent was reached

###### 1.3.1 No of calls/ attempts

##### 1.4 Consenting process

###### 1.4.1 Participant's reaction on the invitation for the phone interview

###### 1.4.2 How the consenting process went

###### 1.4.3 Any questions asked during the consent women wanted clarification for

##### 1.5 Interview venue

###### 1.5.1 Interviewer's venue

###### 1.5.2 Respondent's venue

##### 1.6 How the interview went

###### 1.6.1 Participant's participation

- ❖ Activeness of the participant
- ❖ Ability to understand questions
- ❖ Any barriers for the participant's participation
- ❖ Interruptions
- ❖ People overhearing
- ❖ What went wrong and if addressed, how

###### 1.6.2 Interviewers impression of the interview eg. Good, challenging, difficult, why...

#### 2) FINDINGS

##### ○ Participant's demographics

###### 2.1.1 Age

###### 2.1.2 Occupation

###### 2.1.3 Ethnic group

###### 2.1.4 Religion

###### 2.1.5 Marital status

###### 2.1.6 Education

##### ○ Summary of the findings

Note: The summary of the findings will be descriptive and written following the themes in the guide.

### 3) REFLECTIONS ON HOW THE METHOD WORKED

#### 3.1 How the technology worked / Technical aspects of the phone interviews

- 3.1.1 Connection clarity
- 3.1.2 Audibility
- 3.1.3 Interview recordings
- 3.1.4 Calls being cut/ hanged up
- 3.1.5 Battery issues

#### 3.2 Respondents happiness and distress

- 3.2.1 Any indications coming up?
- 3.2.2 Notable stories
- 3.2.3 Unsureness on your side and why?
- 3.2.4. Ethical concerns

#### 3.3 Interviewer's reflection of how the method worked

- 3.2.1 Thoughts on how the method worked well
- 3.2.3 Thoughts on how the method did not work well

### 4) CONCLUSIONS AND RECOMENDATIONS

- 4.1 About the method
- 4.2 About the findings
